# Supplementary material for: Intraoperative Analgesiesteuerung: Analgesie Nociception Index (ANI) vs. „standard care“ bei Hysterektomien unter Sevoflurannarkose
Source: Springer Nature journal article supplement (doi:10.1007/s00101-023-01288-y), 2023-06-07
Supplement: MOESM1 [file 25459406]

Zusatzmaterial zum Beitrag „Intraoperative Analgesiesteuerung: ANI versus Standard Care bei Hysterektomien unter Sevoflurannarkose“ von Kunst A, Wulf H, Stegmann B und Fiehn A (2023) in *Die Anaesthesiologie*.  
 Beitrag und Zusatzmaterial stehen Ihnen auf [www.springermedizin.de](http://www.springermedizin.de) zur Verfügung. Bitte geben Sie dort den Beitragstitel in die Suche ein.

Untersuchung zur Wertigkeit des Analgesia Nociception Index (ANI) bei Hysterektomien im Hinblick auf den intraoperativen und postoperativen Analgetika Bedarf

## POSTOPERATIVER PATIENTENFRAGEBOGEN

| Fragen                                                                                                                                            | Trifft nicht zu | Trifft eher weniger zu | Trifft weitgehend zu | Trifft voll zu |
|---------------------------------------------------------------------------------------------------------------------------------------------------|-----------------|------------------------|----------------------|----------------|
| Ich habe nach dem Eingriff schnell wieder die Kontrolle über meinen Körper erlangt                                                                |                 |                        |                      |                |
| Ich war nach dem Eingriff zu schwach, mich im Bett aufzurichten, richtig zu schlucken oder zu husten                                              |                 |                        |                      |                |
| Ich war nach dem Eingriff schnell wieder orientiert und konnte mich gut verständlich äußern                                                       |                 |                        |                      |                |
| Ich hatte starke Schmerzen im Operationsgebiet                                                                                                    |                 |                        |                      |                |
| Ich hatte starke Schmerzen an anderen Körperstellen (z.B. Kopf-, Hals-, Rücken-, Brust- oder Gelenkschmerzen)                                     |                 |                        |                      |                |
| Meine Schmerzen waren außer Kontrolle und hätten noch besser behandelt werden müssen                                                              |                 |                        |                      |                |
| Ich hatte Probleme mit der Verdauung                                                                                                              |                 |                        |                      |                |
| Ich habe Übelkeit empfunden oder musste erbrechen                                                                                                 |                 |                        |                      |                |
| Meine Beschwerden wurden ausreichend beachtet und behandelt                                                                                       |                 |                        |                      |                |
| Wie zufrieden waren Sie insgesamt mit Ihrer Schmerztherapie?                                                                                      |                 |                        |                      |                |
| <b>Bitte bewerten Sie diese mit einer „Schulinote“ zwischen 1 – 6</b><br>1= sehr gut 2=gut 3=befriedigend 4=ausreichend 5=mangelhaft 6=ungenügend |                 |                        |                      |                |

**Wir bedanken uns für Ihre Unterstützung und wünschen Ihnen gute Besserung**
